# Supplementary material for: Genomic diversity of Escherichia coli from healthy children in rural Gambia
Source: PeerJ. 2021 Jan 6;9:e10572. doi: 10.7717/peerj.10572 (PMC7796664; doi:10.7717/peerj.10572)
Supplement: Supplemental Information 9 [file peerj-09-10572-s009.xlsx]

## Sheet: Sheet1
Contingency tables and p-value of the Fischer Exact Test, calculated to test for association between phylotypes and each of the virulence factors
Virulence factors are ordered as per increasing p-values
	iron acquisition				evasion/invation				secretion system		iron uptake		protease		iron uptake		Adherence
virulence factor	chuA.S.T.U.V.W.X.Y		shuA.S.T.Y		kpsD.M.T		aslA		espB..D..GK...L..M..N..R..W..X..Y		iutA		sigA		iucA.B.C.D		fdeC		senB		csnA		ibeA		eltA.B		hlyA.B.C.D		aap.aspU		gtrA		fimA..B.C.D.F.G.H.I		faeD.E.F.J		sat		fyuA		irp1.irp2		ybtA.E.P.Q.S.T.U.X		papB..C..D..E..F..G..H..I..J..K..X		estIa		daaF
p-value	1.59837e-07		1.02252e-05		1.72589e-05		1.81723e-05		0.00609756		0.0149728		0.0318456		0.0434997		0.0477855		0.159149		0.170732		0.170732		0.170732		0.174296		0.210882		0.239716		0.277037		0.285178		0.309504		0.336747		0.336747		0.336747		0.343715		0.388743		0.407317
	no	yes	no	yes	no	yes	no	yes	no	yes	no	yes	no	yes	no	yes	no	yes	no	yes	no	yes	no	yes	no	yes	no	yes	no	yes	no	yes	no	yes	no	yes	no	yes	no	yes	no	yes	no	yes	no	yes	no	yes	no
A	13	0	13	0	12	1	5	8	0	13	11	2	13	0	10	3	4	9	12	1	13	0	13	0	13	0	13	0	12	1	11	2	4	9	13	0	10	3	8	5	8	5	8	5	12	1	13	0	12
B1	15	1	15	1	15	1	15	1	0	16	15	1	14	2	14	2	1	15	15	1	16	0	16	0	16	0	14	2	16	0	16	0	2	14	15	1	15	1	13	3	13	3	13	3	15	1	14	2	16
B2	0	2	2	0	0	2	0	2	2	0	0	2	0	2	0	2	2	0	1	1	2	0	1	1	2	0	2	0	2	0	2	0	0	2	2	0	2	0	1	1	1	1	1	1	2	0	2	0	2
C	1	0	1	0	1	0	1	0	0	1	1	0	1	0	1	0	0	1	1	0	1	0	1	0	1	0	1	0	1	0	1	0	0	1	1	0	1	0	1	0	1	0	1	0	1	0	1	0	1
CladeI	1	1	1	1	0	2	0	2	0	2	1	1	2	0	1	1	1	1	2	0	1	1	2	0	1	1	2	0	1	1	1	1	1	1	1	1	2	0	2	0	2	0	2	0	2	0	1	1	2
D	0	5	0	5	1	4	0	5	0	5	5	0	5	0	5	0	0	5	5	0	5	0	5	0	5	0	5	0	4	1	4	1	0	5	4	1	5	0	4	1	4	1	4	1	5	0	5	0	4
E	0	1	0	1	1	0	0	1	0	1	1	0	1	0	1	0	0	1	1	0	1	0	1	0	1	0	1	0	1	0	1	0	0	1	1	0	1	0	0	1	0	1	0	1	1	0	1	0	1
F	0	1	1	0	0	1	0	1	0	1	0	1	1	0	0	1	0	1	0	1	1	0	1	0	1	0	0	1	1	0	1	0	1	0	1	0	0	1	0	1	0	1	0	1	0	1	1	0	1
									l
[truncated: 51 more columns]
